# Supplementary material
Source: Elsevier journal article supplement (https://www.sciencedirect.com/science/article/pii/S0213911118302127)
Supplement: mmc1 [file S0213911118302127:mmc1.doc]

**Appendix**

**Table I**

Participant profiles of the semi-structured interviews conducted in the three different socioeconomic level neighborhoods of the Heart Healthy Hoods Qualitative Study.

| **Low socioeconomic level neighborhood** | **Medium socioeconomic level neighborhood** |  | **High socioeconomic level neighborhood** |
| --- | --- | --- | --- |
| 2 SSIs with key informants | 2 SSIs with key informants |  | 2 SSIs with key informants |
| Principal of school  Director of health center | Principal of school  Director of health center |  | Principal of school  Director of health center |
| Alcohol and tobacco consumption | Alcohol and tobacco consumption |  | Alcohol and tobacco consumption |
| 5 SSIs  Retired housewife whose husband drinks alcohol sometimes  Retired male. He drinks alcohol sometimes  Retired male. Smoker | 6 SSIs  Retired housewife whose husband drinks alcohol sometimes  Widow who participates in programs that promote physical activity  Retired male caring for children. Over 65 years old |  | 5 SSIs  Male whose husband smokes. High income. Over 65 years old  Retired male. Over 65 years old  Working female. High income. 45-55 years old |
| Immigrant male. He has been living in Spain for more than 5 years. 45-55 years old  Immigrant female. She has been living in Spain for more than 5 years. 45-55 years old. | Male smoker. He drinks sometimes. 45-55 years old. Average or high education  Female smoker. 45-55 years old. Average or high educations  Female. She drinks sometimes. 45-55 years old. Average or high education. |  | Working female. High income. She drinks sometimes. 45-55 years old  Working female. Smoker. High income. 45-55 years old |
| Physical activity and diet | Physical activity and diet |  | Physical activity and diet |
|  |  |  |  |
| 5 SSIs | 3 SSIs |  | 6 SSIs |
|  |  |  |  |
| Retired housewife caring for grandchildren  Widow who participates in programs that promote physical activity  Retired male caring for children. Over 65 years old  Immigrant male. He lives with his children. He has been living in Spain for more than 5 years, 45- 55 years old.  Immigrant female. She lives with her children. She has been living in Spain for more than 5 years. 45-55 years old. | Retired housewife caring for grandchildren. Over 65 years old  Widow who participates in programs that promote physical activity. She lives alone  Retired male who participates in programs that promote physical activity. Over 65 years old. |  | Female who has never worked. Grandmother. High family income. Over 65 years old  Working female. Childless. High income. 45-55 years old.  Working female. Has children. High income. 45-55 years old.  Male. Retired. High income. Over 65 years old  Working male. Childless. High income. 45-55 years old.  Working male. Has children. High income. 45-55 years old. |

| SSIs: semi-structured interviews. |  |  |
| --- | --- | --- |

**Table 3. Participant profiles of the Focus Groups (FG) conducted in the three different socioeconomic level neighborhoods** of the Heart Healthy Hoods Qualitative Study.

| Low socioeconomic level neighborhood | Medium socioeconomic level neighborhood |  | High socioeconomic level neighborhood |
| --- | --- | --- | --- |
|  |  |  |  |
|  |  |  |  |
| Alcohol and tobacco consumption | Alcohol and tobacco consumption |  | Alcohol and tobacco consumption |
| 7 FGs  Housewives. Varying family responsibilities. Older than 65.  Retired males. They drink alcohol sometimes. Some participants smoke. Over 65.  Females. Varying family responsibilities. Some participants will be immigrants. 45-55 years old. | 5 FGs  Housewives. Several levels of family responsibilities. Over 65 years old.  Males. Some participants drink and/or smoke. Older than 65 years  Males and females. Year-long workers. Some participants drink and/or smoke. 45-55 years old. |  | 2 FGs  Males and females. High income and very demanding jobs. Varying family responsibilities and situations. Some participants drink and/or smoke. 45-55 years old.  Males and females. Retired. Good economic conditions. Some participants drink and/or smoke. Over 65 years old. |
| Males. Unemployed and contingent workers. Some participants drink and/or smoke. Some participants will be immigrants. 45-55 years old.  Males and females. Year-long workers. Some participants drink and/or smoke. 45-55 years old.  Males and females. Unemployed and contingent workers. Some participants drink and/or smoke. 45-55 years old.  Males and females. Immigrant persons. They have been living in Spain for more than 5 years. Unemployed and working. Some participants drink and/or smoke. 35-55 years old. | Males and females. Unemployed and contingent workers. Some participants drink and/or smoke. 45-55 years old.  Males and females. Immigrant persons. They have been living in Spain for more than 5 years. Unemployed and working. Some participants drink and/or smoke. 35-55 years old |  |  |
| Physical activity and diet | Physical activity and diet |  | Physical activity and diet |
|  |  |  |  |
| 7 FGs | 6 FGs |  | 2 FGs |
|  |  |  |  |
| Housewives. Several levels of family responsibilities. Over 65 years old.  Females. Varying family responsibilities and labor situations. Some participants will be immigrants. 45-55 years old.  Males and females. Unemployed and contingent workers. Some participants will be immigrants. 45-55 years old.  Males and females. Permanent workers. 45-55 years old.  Males and females. Older than 65 years old.  Males. Retiree. Low level of education. 65-75 years old.  Males and females. Immigrant persons. They have been living in Spain for more than 5 years. Unemployed and working. 35-55 years old. | Housewives. Over 65 years old.  Males and females. Varying family situations (single, married, separated…). 45-55 years old.  Males and females. Unemployed and contingent workers. 45-55 years old.  Males and females. Permanent workers. 45-55 years old.  Males and females. Older than 65 years old.  Males and females. Immigrant persons. They have been living in Spain for more than 5 years. Unemployed and working. 35-55 years old. |  | Males and females. High income and very demanding jobs. Several family responsibilities and situations. 45-55 years old.  Males and females. Retired. Good economic conditions. Over 65 years old. |

GUIDE FOR NON-PARTICIPANT OBSERVATION

- Accessibility to the neighborhood. To observe how residents, move around in and out of the neighborhood. Types of public transportation opportunities.
- Types of food stores (supermarkets, traditional markets or traditional shops), estimated profiles of consumers and behavior of consumers in shops.
- Number of schools (private or public) and interactions between children and persons who come to pick them up (it is very common for grandparents to wait for their grandchildren to get out of school).
- Number of Health centers (private or public) in the neighborhood or close to the neighborhood. To look into the type of persons who use the health centers and what types of services are provided by the health center (in some neighborhoods there is a mobile unit for the prevention of HIV –Human Immunodeficiency Virus- and sexual transmitted diseases).
- Number of parks and green spaces. To look into the type of persons who use these types of spaces and the kind of usage.
- Existence of neighborhood organizations in the neighborhood. To analyze their activities briefly.
- Existence of churches and centers of Red Cross and Caritas. To look into the possible assistance for persons who need it, especially food.
- Bars (estimated number), type of bar (home-cooked food or fast food), possible existence of bars related to some culture (i.e. a Moroccan restaurant), type of consumption in bars (consumption of alcohol or other drinks).
- Existence of tobacco stores. Consumption of tobacco and profile of consumers.
- Existence of sports centers, gyms, basketball courts. To indicate whether these facilities are public or private.
- Existence of retirement centers, to briefly analyze activities done in these centers and profile of their users.
- Existence of sports betting sites and profile of users.
- To observe the cleanliness or dirtiness of the streets.
- To look into the neighborhood social and economic differences between distinct areas of the neighborhood (types of buildings, types of businesses, types of persons).
- The observation included a walk around the neighborhood (paying attention to the kinds of people there are, if they walk with a dog or child, if the people drink in the street, if the persons walk very fast or slowly, state of trash cans).
